# Supplementary material
Source: PubMed Central journal article supplement (PMC2662589)
Supplement: NIHMS62380-supplement-suppinfo.pdf [file NIHMS62380-supplement-suppinfo.pdf]

Supporting Table. Summary of EXAFS Fitting Results for copper RBP. The best fit is shown in bold.

| Sample | Fit #          | Ligand Environment <sup>a</sup> |                   |                   |                         | Ligand Environment <sup>a</sup> |                       |                     |                         | F, <sup>f</sup> |
|--------|----------------|---------------------------------|-------------------|-------------------|-------------------------|---------------------------------|-----------------------|---------------------|-------------------------|-----------------|
|        |                | Atom <sup>b</sup>               | R(Å) <sup>c</sup> | C.N. <sup>d</sup> | $\sigma^2$ <sup>e</sup> | Atom <sup>b</sup>               | R(Å) <sup>c</sup>     | C.N. <sup>d</sup>   | $\sigma^2$ <sup>e</sup> |                 |
| RBP    | 1 <sup>g</sup> | O/N                             | 1.96              | 3.0               | 4.17                    |                                 |                       |                     |                         | <b>0.39</b>     |
|        | 2 <sup>g</sup> | <b>O/N</b>                      | <b>1.96</b>       | <b>3.0</b>        | <b>4.17</b>             | <b>C/C</b>                      | <b>2.97/<br/>3.92</b> | <b>0.5/<br/>1.5</b> | <b>1.79/<br/>3.44</b>   | <b>0.35</b>     |
|        | 3 <sup>h</sup> | N <sub>Im</sub>                 | 1.98              | 1.0               | 4.56                    | O                               | 1.96                  | 2.0                 | 3.09                    | 0.37            |

<sup>a</sup> Independent metal-ligand scattering environment. <sup>b</sup> Scattering atoms: O (Oxygen), N (Nitrogen), C (Carbon). <sup>c</sup> Metal-ligand bond length in Å. <sup>d</sup> Metal-ligand coordination number. <sup>e</sup> Debye-Waller factor in Å<sup>2</sup> x 10<sup>3</sup>. <sup>f</sup> Number of degrees of freedom weighted mean square deviation between data and fit. <sup>g</sup> Fit using only single scattering Feff 7 theoretical models. <sup>h</sup> fit using both single scattering Feff 7 model with an additional multiple scattering Fe-N(Imidazole) model, generated based on crystallographic coordinates listed in [6] and labeled N<sub>Im</sub> in table atom designation. Details of fitting are described in the Experimental Section.
